# Supplementary material
Source: HighWire-hosted journal article supplement (https://ard.bmj.com/content/75/9/1693)

# Supplementary Figure S2. Bland-Altman analysis

## assay #1 vs. assay #2

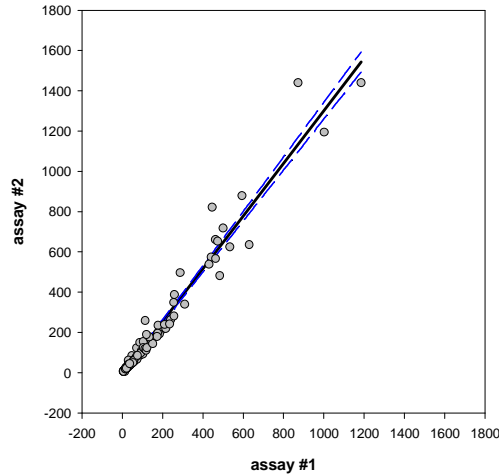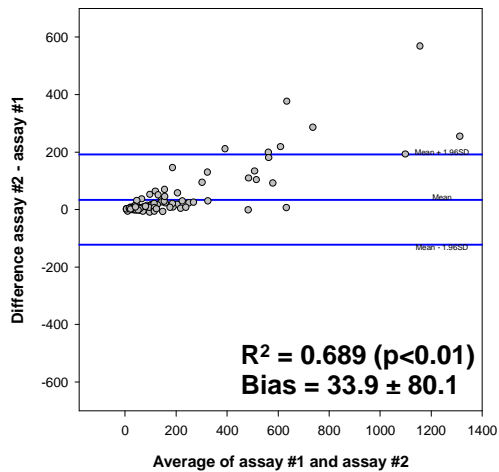

## assay #1 vs. assay #3

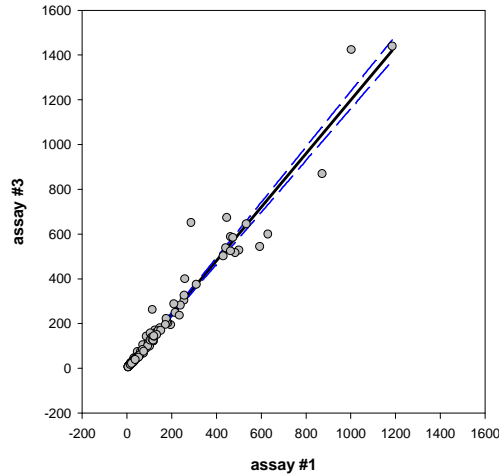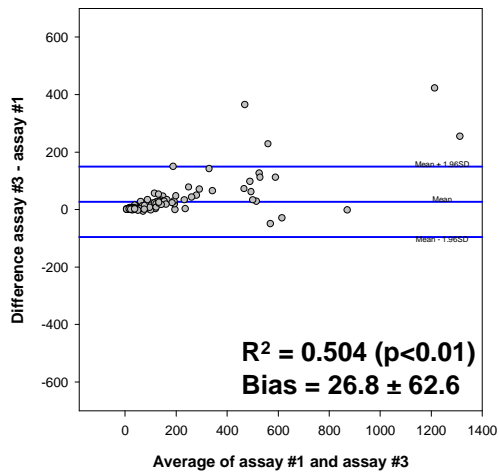

## assay #2 vs. assay #3

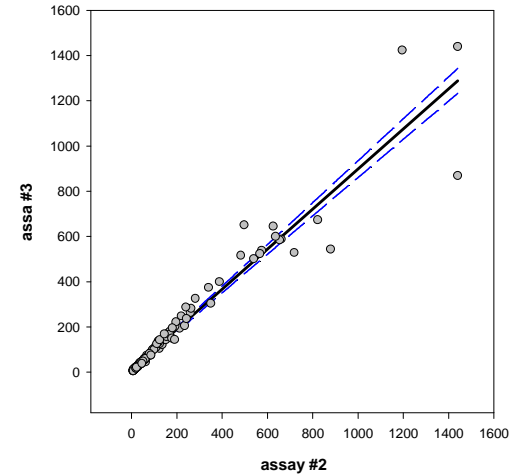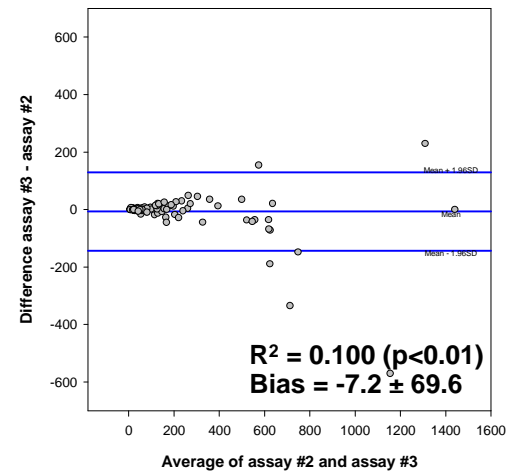

Supplement: inline-supplementary-material-2 [file inline-supplementary-material-2.pdf]
